# Supplementary material for: Tailoring the interface of lithium metal batteries with an in situ formed gel polymer electrolyte
Source: Royal Society of Chemistry journal article supplement (doi:10.1039/d4ta01629g), 2024-01-01
Supplement: d4ta01629g1.pdf [file d4ta01629g1.pdf]

## Supporting Information

### **Tailoring the interface of lithium metal batteries with in situ formed gel polymer electrolyte**

*SiXin Jia,<sup>a</sup> Jinxin Xue,<sup>a</sup> Hong Huo,<sup>a</sup> JianJun Zhou,<sup>\*a</sup> Lin Li<sup>\*a,b</sup>*

*<sup>a</sup> Beijing Key Laboratory of Energy Conversion and Storage Materials, College of Chemistry, Beijing Normal University, Beijing 100875, China*

*<sup>b</sup> College of Textiles & Clothing, Qingdao University, Qingdao 266071, China*

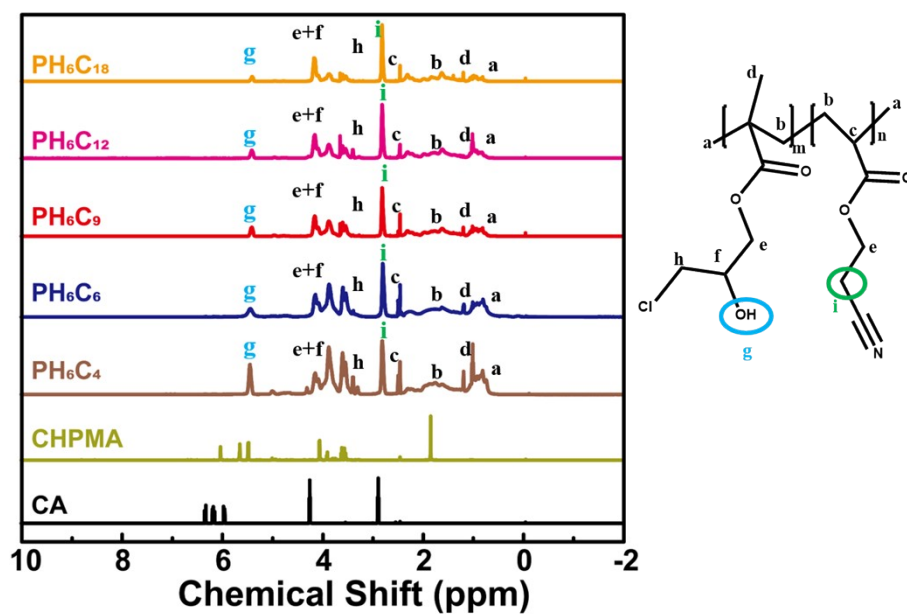

**Fig. S1.**  $^1\text{H}$  NMR spectra of monomers and binary copolymers with different proportions.

**Table S1.** Area ratio of binary copolymer with different feed ratio.

| Polymer                    | Theoretical feed ratio | Theoretical area ratio | Actual area ratio |
|----------------------------|------------------------|------------------------|-------------------|
| $\text{PH}_6\text{C}_4$    | 1:0.67                 | 1:1.34                 | 1:1.31            |
| $\text{PH}_6\text{C}_6$    | 1:1.00                 | 1:2.00                 | 1:2.20            |
| $\text{PH}_6\text{C}_9$    | 1:1.50                 | 1:3.00                 | 1:3.18            |
| $\text{PH}_6\text{C}_{12}$ | 1:2.00                 | 1:4.00                 | 1:4.17            |
| $\text{PH}_6\text{C}_{18}$ | 1:3.00                 | 1:6.00                 | 1:6.19            |

**Table S2.** The Mn, Mw and polydispersity index (PDI) of PHCs.

| <b>PHCs</b>                     | <b>Mn</b> | <b>Mw</b> | <b>PDI</b> |
|---------------------------------|-----------|-----------|------------|
| PH <sub>6</sub> C <sub>4</sub>  | 76358     | 286397    | 3.75       |
| PH <sub>6</sub> C <sub>6</sub>  | 62748     | 223771    | 3.57       |
| PH <sub>6</sub> C <sub>9</sub>  | 59489     | 221247    | 3.72       |
| PH <sub>6</sub> C <sub>12</sub> | 65855     | 217830    | 3.31       |
| PH <sub>6</sub> C <sub>18</sub> | 58597     | 221321    | 3.78       |

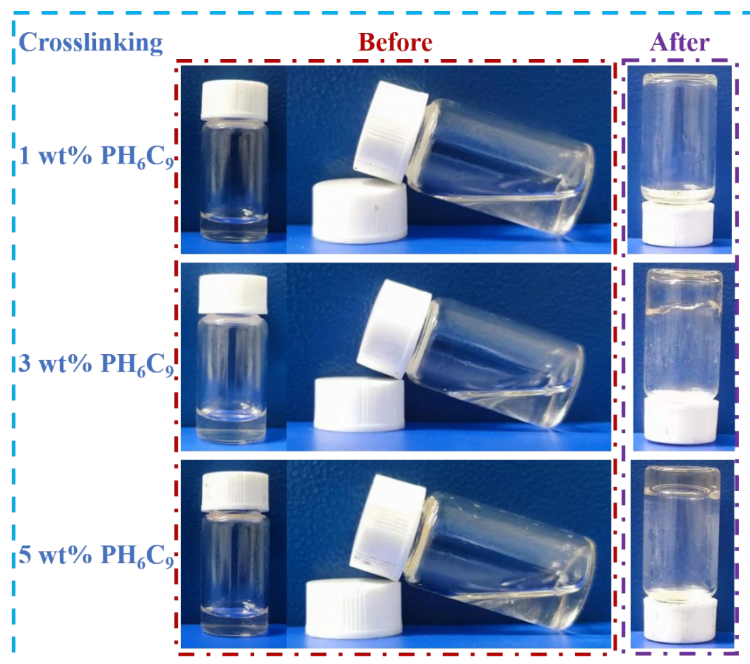

**Fig. S2.** Photographs of  $c\text{-PH}_6\text{C}_9\text{-GPE}$  with different content of  $\text{PH}_6\text{C}_9$ .

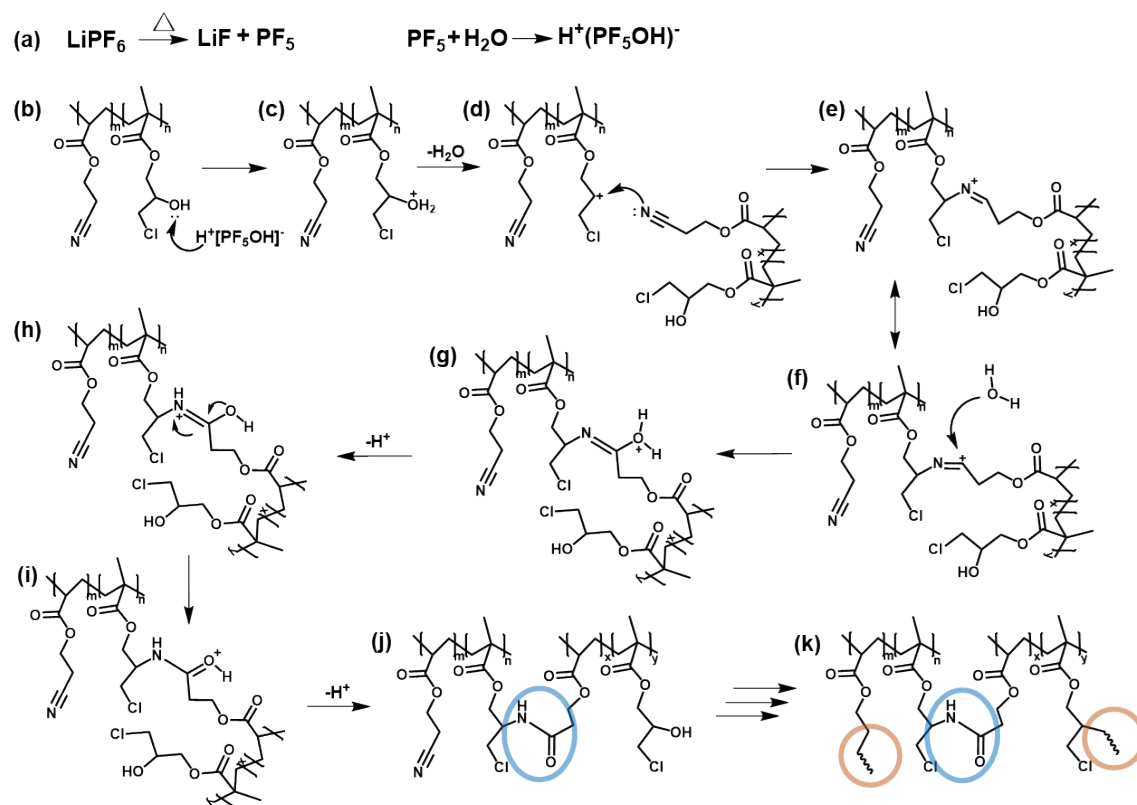

**Fig. S3.** The cross-linked polymer matrix of *c*-PHC-GPE formed through Ritter reaction.

During heating, a slight number of  $\text{LiPF}_6$  will decompose to produce  $\text{LiF}$  and  $\text{PF}_5$ .  $\text{PF}_5$  will combine with trace of  $\text{H}_2\text{O}$  in LE to form  $\text{H}^+(\text{PF}_5\text{OH})^-$ , which initiates Ritter reaction (Fig. S3a). The dissociated  $\text{H}^+$  will attack the nucleophilic O on hydroxyl group and form  $\text{H}_2\text{O}^+$  in the side chain (Fig. S3b). The detachment of  $\text{H}_2\text{O}$  lead to the formation of carbocation (Fig. S3c). The electrophilic nitrile group will attack the carbocation ion and form imine cation (Fig. S3d and e). The more stable imine cation capture  $\text{H}_2\text{O}$ , which turns into amide group after tautomerism rearrangement (Fig. S3f-j). The Ritter reaction takes place among chain segments, forming amide covalently cross-linked polymer matrix (Fig. S3k).

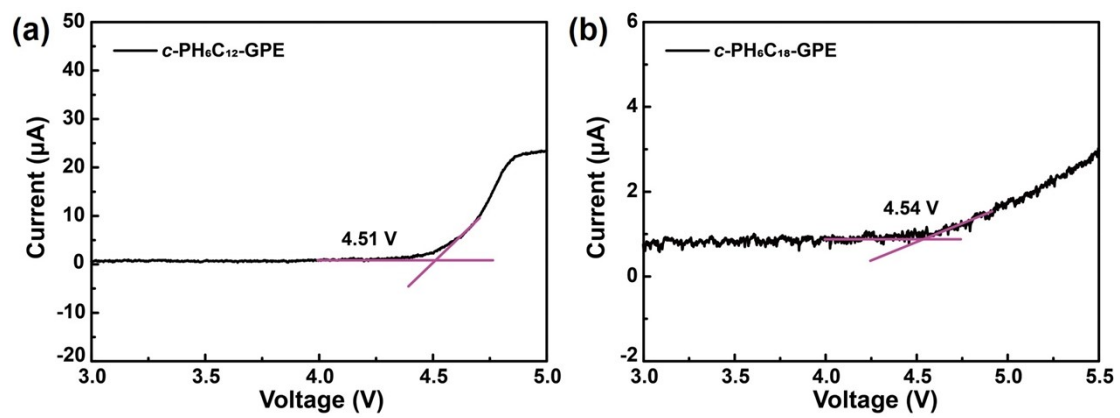

**Fig. S4.** The LSV curves of  $c\text{-PH}_6\text{C}_{12}\text{-GPE}$  and  $c\text{-PH}_6\text{C}_{18}\text{-GPE}$ .

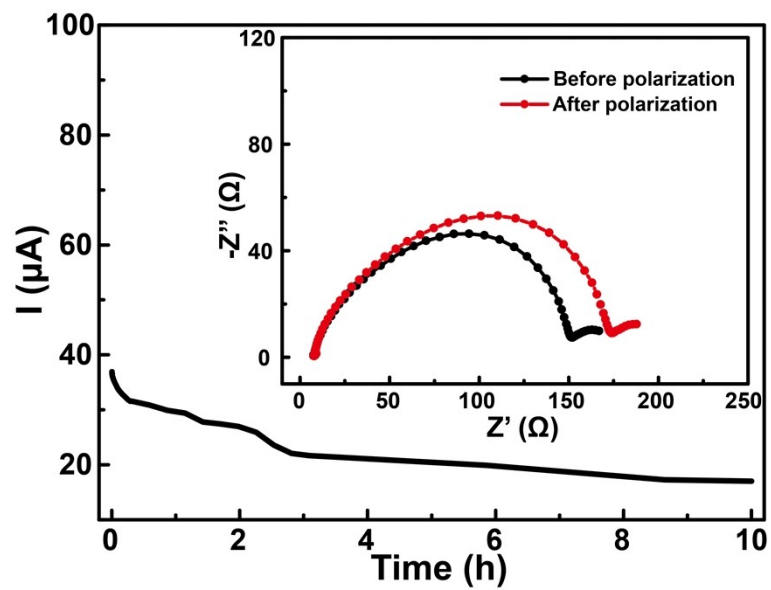

Fig. S5. Polarization curve and impedance curve diagrams of LE.

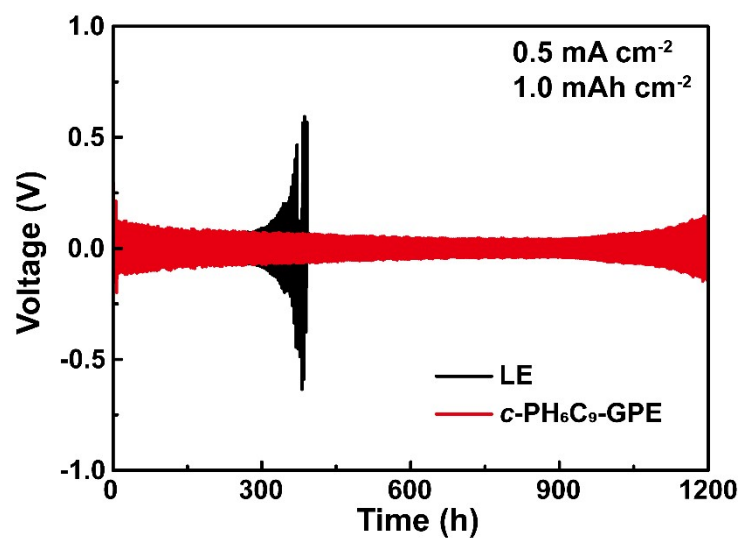

**Fig. S6.** The potential profiles of Li||Li symmetric batteries with LE and *c*-PH<sub>6</sub>C<sub>9</sub>-GPEs at a current density of 0.5 mA cm<sup>-2</sup>.



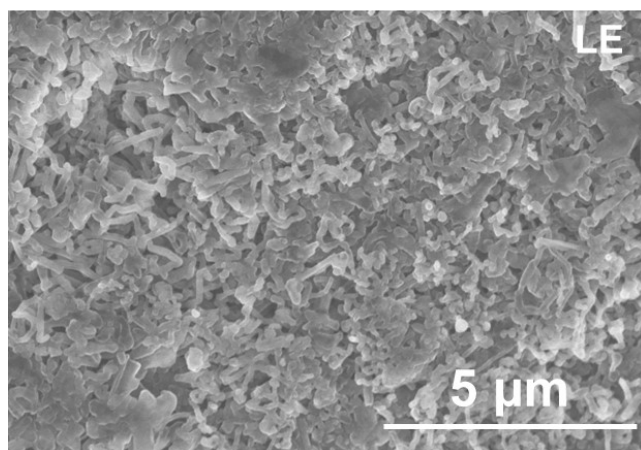

**Fig. S7.** The surface SEM images of Li anode after cycling with LE.

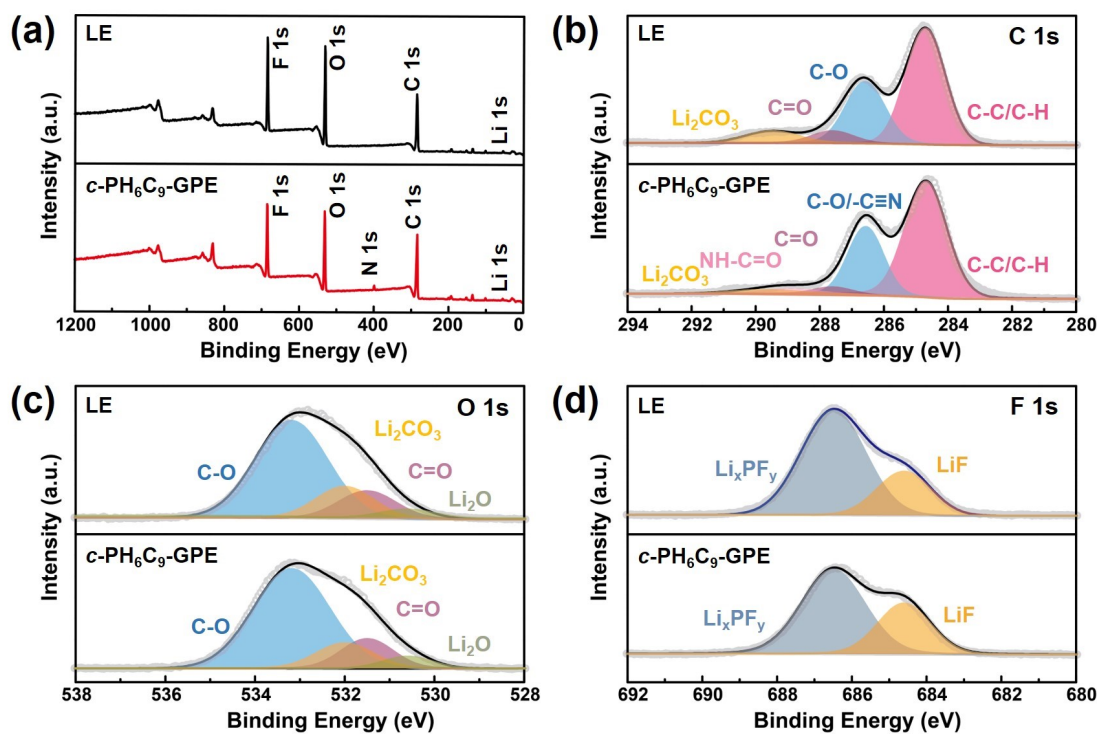

**Fig. S8.** (a) The survey spectra, (b) C 1s, (c) O 1s and (d) F 1s XPS spectra of Li electrode surface in Li||Li symmetric batteries with LE and *c*-PH<sub>6</sub>C<sub>9</sub>-GPE.

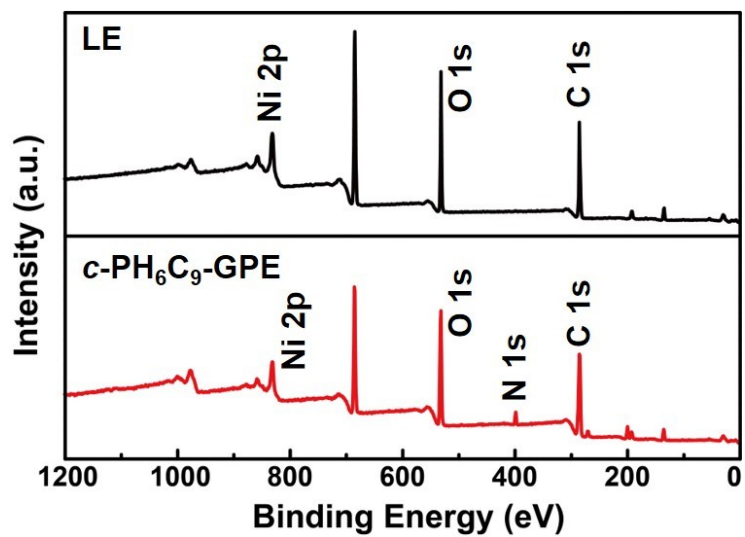

**Fig. S9.** The XPS survey spectra of NCM622 cathodes from Li|LE|NCM622 and Li|c-PH<sub>6</sub>C<sub>9</sub>-GPE|NCM622 batteries after 50 cycles.

**Table S3.** The performance comparison of the polymer electrolytes and Li||NCM batteries in the literatures.

| Electrolytes                                    | $\sigma$<br>(mS cm <sup>-1</sup> ) | LSV<br>(V)  | $t_{Li^+}$  | Cathode       | Mass<br>loading<br>(mg cm <sup>-2</sup> ) | Rate<br>(C) | Capacity<br>retention<br>ratio (%) | Cycle<br>number | Ref.             |
|-------------------------------------------------|------------------------------------|-------------|-------------|---------------|-------------------------------------------|-------------|------------------------------------|-----------------|------------------|
| LiTFSI-LIBF <sub>4</sub> -<br>Poly(DOL)         | 1.18                               | 4.8         | 0.68        | NCM811        | 3.4                                       | 1.0         | 88.6                               | 300             | S1               |
| PEGMEMMA-<br>SN-LLZT                            | 1.117                              | 5.06        | 0.627       | NCM811        | 1.5                                       | 0.5         | 61                                 | 400             | S2               |
| PEO-<br>PVDF/LLZTO                              | 0.361                              | 4.9         | /           | NCM622        | 2.5                                       | 0.5         | 77.4                               | 200             | S3               |
| MOFLi/MSLi<br>QSE                               | 0.15                               | 0.71        | 4.6         | NCM622        | 1.0                                       | 1.0         | 70                                 | 200             | S4               |
| PVFH-PMC-<br>PEGC                               | 2.7                                | /           | 0.77        | NCM622        | 1.5                                       | /           | 93.8                               | 100             | S5               |
| GF-SSE-N                                        | 1.4                                | 4.5         | 0.54        | NCM622        | 3.0                                       | 0.2         | 97                                 | 50              | S6               |
| PAN-PEO-<br>TEGDME                              | 0.038                              | 4.8         | 0.41        | NCM622        | 1.5                                       | 0.1         | ~60                                | 100             | S7               |
| Poly(DOL)                                       | 3.03                               | 4.6         | 0.71        | NCM622        | 4.5                                       | 0.5         | 93                                 | 100             | S8               |
| P(CUMA-<br>CUEM)-QPE                            | 0.48                               | 5.6         | 0.47        | NCM622        | 2.0                                       | 0.5         | 78.1                               | 200             | S9               |
| <b><i>c</i>-PH<sub>6</sub>C<sub>9</sub>-GPE</b> | <b>1.20</b>                        | <b>4.89</b> | <b>0.68</b> | <b>NCM622</b> | <b>4.5</b>                                | <b>0.5</b>  | <b>90.4%</b>                       | <b>200</b>      | <b>This work</b> |

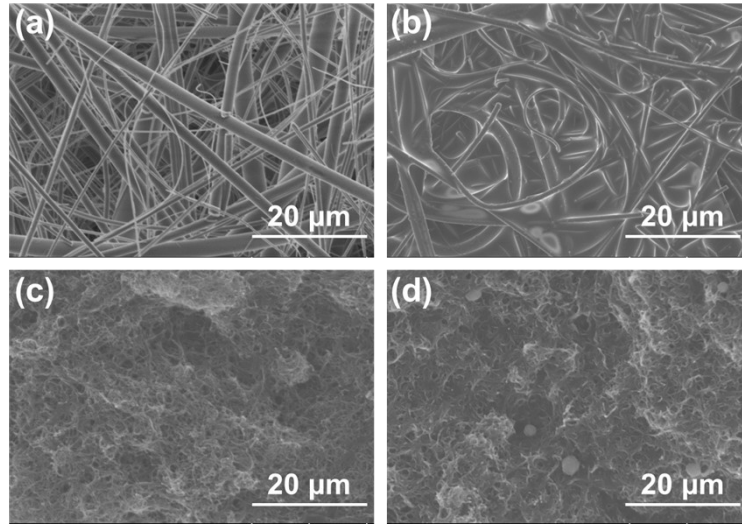

**Fig. S10.** The SEM images of GF membrane (a) before and (b) after infiltrating and cross-linking. The SEM images of cathode surface (c) before and (d) after infiltrating and cross-linking.

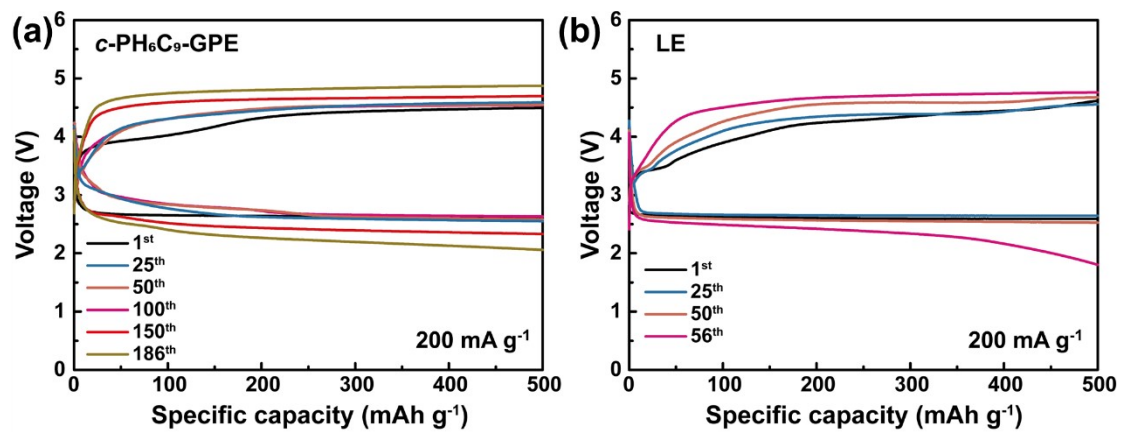

**Fig. S11.** Discharge/charge curves of Li-O<sub>2</sub> batteries with (a) *c*-PH<sub>6</sub>C<sub>9</sub>-GPE and (b)

LE.

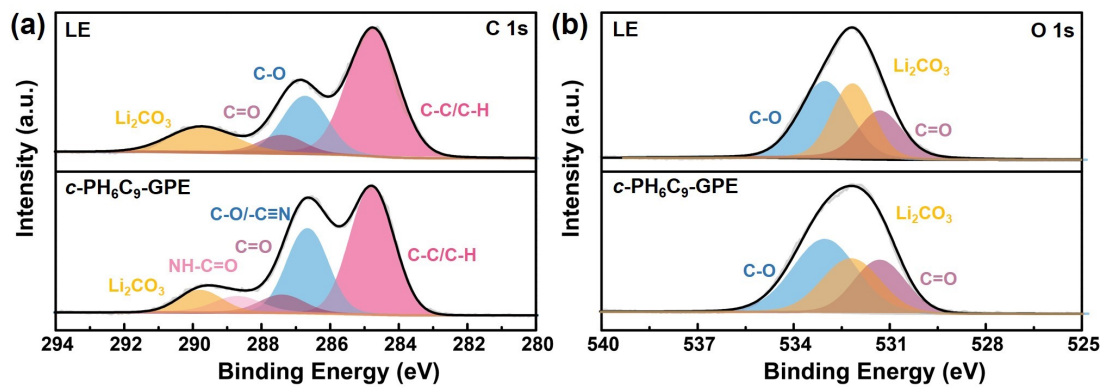

**Fig. S12.** XPS spectra of cathode surface for Li|LE|O<sub>2</sub> battery and Li|c-PH<sub>6</sub>C<sub>9</sub>-GPE|O<sub>2</sub> battery: (a) C 1s and (b) O 1s.

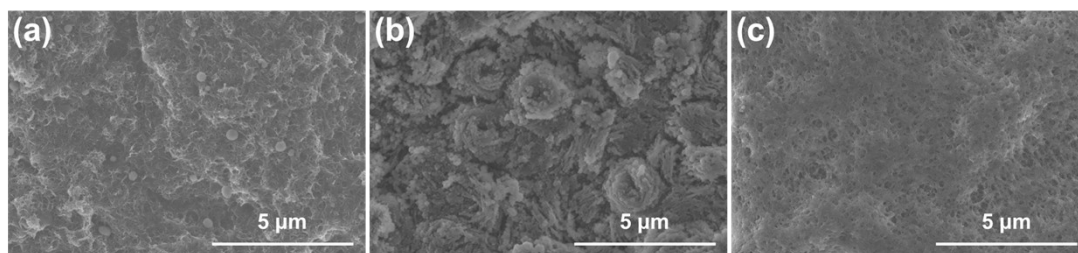

**Fig. S13.** The SEM images of cathode surface after (a) pristine, (b) the 1<sup>st</sup> cycle after fully discharged and (c) the 1<sup>st</sup> cycle after fully charged.



**Table S4.** The EIS fitted values of the Li-O<sub>2</sub> batteries with LE and *c*-PH<sub>6</sub>C<sub>9</sub>-GPE.

| Battery          | Li LE O <sub>2</sub> |                     | Li  <i>c</i> -PH <sub>6</sub> C <sub>9</sub> -GPE O <sub>2</sub> |                     |
|------------------|----------------------|---------------------|------------------------------------------------------------------|---------------------|
|                  | R <sub>SEI</sub> (Ω) | R <sub>ct</sub> (Ω) | R <sub>SEI</sub> (Ω)                                             | R <sub>ct</sub> (Ω) |
| 1 <sup>st</sup>  | 67.3                 | 64.0                | 161.5                                                            | 79.5                |
| 20 <sup>th</sup> | 78.9                 | 159.1               | 129.8                                                            | 64.4                |
| 50 <sup>th</sup> | 212.1                | 302.8               | 82.5                                                             | 210.5               |

## References

1. Q. Liu, Y. Sun, S. Wang, Q. An, L. Duan, G. Zhao, C. Wang, K. Doyle-Davis, H. Guo and X. Sun, *Mater. Today*, 2023, **64**, 21-30.
2. A. G. Nguyen, M. H. Lee, J. Kim and C. J. Park, *Nano-Micro Lett.*, 2024, **16**, 83.
3. L. Li, Y. Deng, H. Duan, Y. Qian and G. Chen, *J. Energy Chem.*, 2022, **65**, 319-328.
4. Z. Chen, W. Zhao, Q. Liu, Y. Xu, Q. Wang, J. Lin and H. B. Wu, *Nano-Micro Lett.*, 2024, **16**, 114.
5. P. Zhai, W. He, C. Zeng, L. Li and W. Yang, *Chem. Eng. J.*, 2023, **451**, 138414.
6. M. Yang, S. Li, G. Zhang, M. Huang, J. Duan, Y. Cui, B. Yue and H. Liu, *ACS Appl. Mater. Interfaces*, 2023, **15**, 18323-18332.
7. Y. Liu, F. Fu, C. Sun, A. Zhang, H. Teng, L. Sun and H. Xie, *Inorganics*, 2022, **10**, 42.
8. Q. Ma, J. Yue, M. Fan, S. J. Tan, J. Zhang, W. P. Wang, Y. Liu, Y. F. Tian, Q. Xu, Y. X. Yin, Y. You, A. Luo, S. Xin, X. W. Wu and Y. G. Guo, *Angew. Chem. Int. Ed.*, 2021, **60**, 16554-16560.
9. H. Xu, C. Sun, S. Zhang, H. Zhang, Z. Liu, Y. Tang and G. Cui, *ChemSusChem*, 2023, **16**, e202202334.
